# Supplementary material for: Demonstrating the Role of Osmosis in Diabetes Using Growing Spheres
Source: Oxford University Press journal article supplement (doi:10.1525/abt.2020.82.7.494), 2020-09-01
Supplement: abt_82_7_494_ds002.docx [file abt_82_7_494_ds002.docx]

| Group 1 | Group 2 | Group 3 | Group 4 |
| --- | --- | --- | --- |
| - Claim answers investigation question - Uses data from each serum as evidence - Reasoning is based on the concept of osmosis and how blood glucose concentration would affect a cell - Includes correct set up of graph | - Claim answers investigation question - Uses data from each serum as evidence - Reasoning is based on the concept of osmosis and how blood glucose concentration would affect a cell - Includes correct set up of graph | - Claim answers investigation question - Uses data from each serum as evidence - Reasoning is based on the concept of osmosis and how blood glucose concentration would affect a cell - Includes correct set up of graph | - Claim answers investigation question - Uses data from each serum as evidence - Reasoning is based on the concept of osmosis and how blood glucose concentration would affect a cell - Includes correct set up of graph |
| Notes: | Notes: | Notes: | Notes: |
| Group 5 | Group 6 | Group 7 | Connect Questions  Do we all agree on our claims, trends in the evidence, reasoning?  Are there differences between group explanations? Are these differences significant?  How do we know that it is only water moving across the cell membrane?  What is the connection between osmosis and the symptoms of diabetes?  How would long-term uncontrolled diabetes affect the body? |
| - Claim answers investigation question - Uses data from each serum as evidence - Reasoning is based on the concept of osmosis and how blood glucose concentration would affect a cell - Includes correct set up of graph | - Claim answers investigation question - Uses data from each serum as evidence - Reasoning is based on the concept of osmosis and how blood glucose concentration would affect a cell - Includes correct set up of graph | - Claim answers investigation question - Uses data from each serum as evidence - Reasoning is based on the concept of osmosis and how blood glucose concentration would affect a cell - Includes correct set up of graph |
| Notes: | Notes: | Notes: |
